# Supplementary material for: Routine single particle CryoEM sample and grid characterization by tomography
Source: eLife. 2018 May 29;7:e34257. doi: 10.7554/eLife.34257 (PMC5999397; doi:10.7554/eLife.34257)
Supplement: Figure 3—source data 1. [file elife-34257-fig3-data1.xlsx]

## Sheet: Min Ice thickness center
From Table
Gold Spotiton	Carbon Spotiton	Holey Carbon
30	65
55	25	40
20		42.5
15		35
	75	30
	190	60
15	35	110
30		60
40		35
50		125
25	30	20
25	15
25	25
	60
	35
	25
	30
	50
	30
	30
	40
	35
Avg	Avg	Avg
30	46.7647	55.75
StDev	StDev	StDev
13.2288	40.1926	34.9613
N=11	N=17	N=10
Measurement Error	Measurement Error	Measurement Error
1.66667	1.21268	1.58114
StDev + Meas. Error	StDev + Meas. Error	StDev + Meas. Error
13.3333	40.2108	34.997

## Sheet: Min Ice thickness edge
Gold Spotiton	Carbon Spotiton	Holey Carbon
50	45
65		95
75	100	85
55		85
		120
	265	70
	70	115
		140
	70	80
	100
	90
	75
	110
	60
	100
	180
	125
	100
	145
	80
Avg	Avg	Avg
61.25	107.188	98.75
StDev	StDev	StDev
11.0868	53.6025	23.8672
N=4	N=16	N=8
Measurement Error	Measurement Error	Measurement Error
2.5	1.25	1.76777
StDev + Meas. Error	StDev + Meas. Error	StDev + Meas. Error
11.3652	53.6171	23.9326

## Sheet: Avg Layer angle center
Average angle	Average	StDev	Measurement Error	StDev+Meas Error
8	4.79213	3.06447	0.106	3.0663
8
6
6
4
4
5
5
7
3
3
6
6
1
1
0
0
8.5
7
10
10
7
7
0
0
6.5
6.5
2
2
6
6
4
4
10
4
3
5
3
3
6
6
5
5
1.5
1.5
2
2
9
9
0
0
2
2
5
5
7
7
10
10
4
4
1
1
5
5
8
8
5
5
4
5.5
5
1
3
3
5
5
2.5
2.5
3
3
3.5
6
11
11
12
0
12
0

## Sheet: Avg Layer angle edge
Average angle	Average	StDev	Measurement Error	StDev+Meas Error
10	6.88525	3.47658	0.128037	3.47894
10
5
3
6
3
3
8
9
7
7
5
4.5
7
7
4
11
9
1
10
11
11
11
6
10
5
5
5
6.5
9
9
5
2
3
7
13
9
1
16
10
2
7
6
4
1
10
3
6
4
7
5
7
5
14
3
3.5
6
6
11
12
13.5

## Sheet: Ice thickness single-double
Percentages of measurable layers
	Single layer center	Double layer center	Single layer edge	Double layer edge
	55	25		100
	20	75		265
	15	190	85	70
	35		80	70
		60		90
		30		50
		90		75
		125		110
		100		65
	40			60
	30			75
	15			100
	25			120
	15			180
	35			80
	35			125
	30			100
	25			55
	40			145
	50			115
	30			140
	30			120
	60
	50
	50
	25
	25
	30
	30
	25
	40
	60
	35
	50
	20
	Avg	Avg	Avg	Avg
	34.1667	86.875	82.5	105
	StDev	StDev	StDev	StDev
	13.0042	53.7147	3.53553	48.4768
	N=30/36	N=8/36	N=2/28	N=21/28
	Measurement Error	Measurement Error	Measurement Error	Measurement Error
	0.912871	1.76777	3.53553	1.066
	StDev + Meas. Error	StDev + Meas. Error	StDev + Meas. Error	StDev + Meas. Error
	13.0362	53.7438	5	48.4885
